# Supplementary material
Source: Springer Nature journal article supplement (https://www.springermedizin.de/resource/supplementary/12998_2012_62_MOESM3_ESM.pdf/9680080)

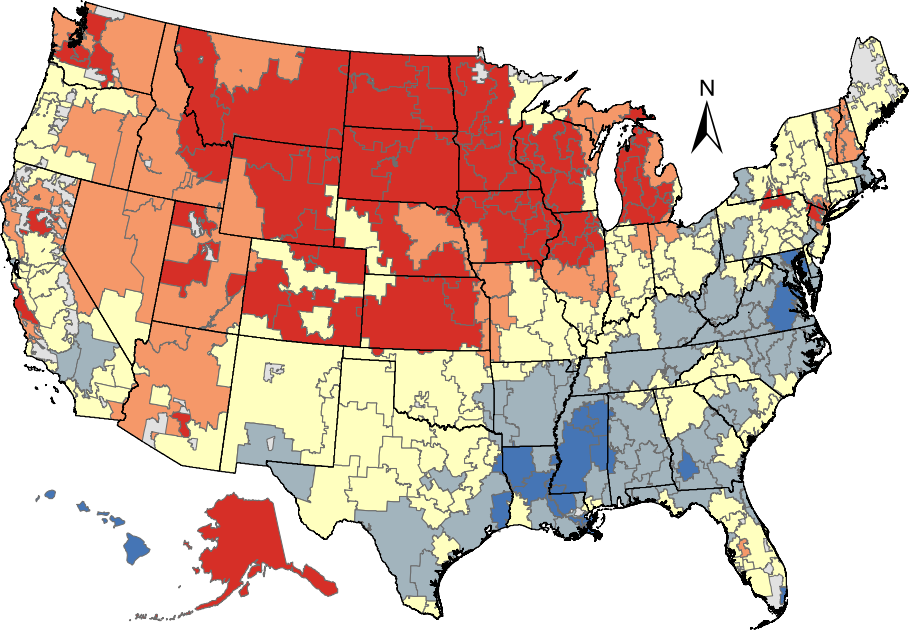

### Ratio of Observed to Expected

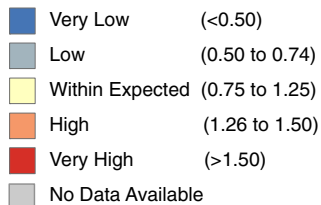

Supplement: MOESM3 [file 9680080]
